# Trade-offs between host tolerances to different pathogens in plant-virus interactions

Nuria Montes<sup>1,2</sup>, Viji Vijayan<sup>1</sup> and Israel Pagán<sup>1\*</sup>

<sup>1</sup>*Centro de Biotecnología y Genómica de Plantas UPM-INIA and E.T.S. Ingeniería Agronómica, Alimentaria y de Biosistemas, Universidad Politécnica de Madrid, Madrid, 28223, Spain.*

<sup>2</sup>*Current address: Fisiología Vegetal, Departamento Ciencias Farmacéuticas y de la Salud, Facultad de Farmacia, Universidad San Pablo-CEU universities, Boadilla del Monte (Madrid), Spain and Servicio de Reumatología, Hospital Universitario de la Princesa, Instituto de Investigación Sanitaria (IIS-IP), Madrid, Spain,*

\* Corresponding author

Dr. Israel Pagán

Tel: +34 91 0679165 ext. 79165

email: [jesusisrael.pagan@upm.es](mailto:jesusisrael.pagan@upm.es)

34 **Abstract**

35 Although accumulating evidence indicates that tolerance is a plant defence strategy against  
36 pathogens as widespread as resistance, how plants evolve tolerance is poorly understood.  
37 Theory predicts that hosts will evolve to maximize tolerance or resistance, but not both.  
38 Remarkably, most experimental works failed in finding this trade-off. We tested the hypothesis  
39 that the evolution of tolerance to one virus is traded-off against tolerance to others, rather than  
40 against resistance, and identified the associated mechanisms. To do so, we challenged  
41 eighteen *Arabidopsis thaliana* genotypes with *Turnip mosaic virus* (TuMV) and *Cucumber*  
42 *mosaic virus* (CMV). We characterized plant life-history trait modifications associated with  
43 reduced effects of TuMV and CMV on plant seed production (fecundity tolerance) and life  
44 period (mortality tolerance), both measured as a norm of reaction across viral loads (range  
45 tolerance). Also, we analysed resistance-tolerance and tolerance-tolerance trade-offs. Results  
46 indicate that tolerance to TuMV is associated with changes in the length of the pre-reproductive  
47 and reproductive periods, and tolerance to CMV with resource reallocation from growth to  
48 reproduction; and that tolerance to TuMV is traded-off against tolerance to CMV in a virulence-  
49 dependent manner. Thus, this work provides novel insights on the mechanisms of plant  
50 tolerance and highlights the importance of considering the combined effect of different  
51 pathogens to understand how plant defences evolve.

52

53

54

55

56

57

58 **Keywords**

59 *Arabidopsis thaliana*; *Cucumber mosaic virus* (CMV); Evolution of tolerance; Resistance;  
60 Tolerance-tolerance trade-offs; *Turnip mosaic virus* (TuMV).

61

62

63

64

65

66

67

68

69

## 70 Introduction

71 Parasitism is a lifestyle chosen by 50% of all known organisms (*Poulin & Morand, 2000*). This  
72 means that, along their lifespan, hosts will be recurrently challenged by parasites. Parasites  
73 may be pathogens, causing diseases that have a negative impact on the fitness of infected  
74 hosts, i.e., virulence (*Read, 1994; Anderson et al., 2004*). To cope with pathogens, hosts have  
75 developed a variety of defence mechanisms to avoid/limit infection and its negative effects  
76 (*Agnew et al., 2000*), which have relevant consequences for the fitness of both interacting  
77 partners (*Woolhouse et al., 2002*). Thus, investigating the evolution and the mechanistic basis  
78 of these defences is central to understand the dynamics of host-pathogen interactions (*Jones*  
79 *& Dangl, 2006; Pagán & García-Arenal, 2018*).

80 The two main host defences against pathogens are resistance, i.e., the host's ability to  
81 limit pathogen multiplication (*Clarke 1986; Strauss & Agrawal, 1999*), and tolerance, i.e., the  
82 host's ability to reduce the effect of infection on its fitness at a given pathogen load (*Little et al.*  
83 *2010; Råberg, 2014*). They represent two different strategies to deal with pathogens:  
84 resistance reduces the risk of infection and the multiplication rate of the pathogen, whereas  
85 tolerance does not. Hence, it is predicted that if hosts evolve resistance the prevalence of the  
86 pathogen in the host population will decrease, whereas tolerance will increase prevalence (*Roy*  
87 *& Kirchner, 2000*). Consequently, both resistance and tolerance may have significant, but  
88 different, impact on the dynamics of host and pathogen populations (*Roy & Kirchner, 2000;*  
89 *Pagán & García-Arenal, 2018*). Researchers have devoted considerable effort to understand  
90 the molecular basis and evolutionary consequences of resistance to pathogens. However,  
91 tolerance has received comparatively less attention, and the processes shaping its evolution  
92 are only partially understood (*Little et al., 2010; Pagán & García-Arenal, 2018*).

93 A body of mathematical work has modelled the conditions in which tolerance evolves.  
94 Early models assumed that resources are limited and can be diverted into resistance or  
95 tolerance, but not both, and predicted that tolerance or resistance would prevail because they  
96 were mutually exclusive (*van der Meijden et al., 1988; Herms & Mattson, 1992*). More recent  
97 models incorporated the idea that resistance and tolerance might not be fully exchangeable,  
98 and predicted that both defence mechanisms would coexist, with host fitness maximized: (i)  
99 only at maximum tolerance or maximum resistance (*Mauricio et al., 1997; Boots & Bowers,*  
100 *1999*), or (ii) at intermediate levels of both (*Restif & Koella, 2003,2004; Fornoni et al., 2004*).  
101 In none of these scenarios tolerance and resistance can be maximized simultaneously. Hence,  
102 the common idea underlying the theory on the evolution of tolerance is that there is a trade-off  
103 between resistance and tolerance. However, there is remarkably little experimental support for  
104 such trade-off in host-pathogen, and particularly in plant-pathogen, interactions. Indeed, most  
105 studies on plant viruses (*Carr et al., 2006; Pagán et al., 2007,2009; Montes et al., 2019*),

106 bacteria (*Kover & Schaal, 2002; Goss & Bergelson, 2006*) and fungi (*Simms & Triplett, 1994*)  
107 failed in finding a resistance-to-tolerance negative association.

108 A possible explanation for this lack of support of a resistance-tolerance trade-off is that  
109 other forces might come into play in shaping the evolution of plant defences. In nature, plant  
110 populations are challenged by multiple pathogens (*Syller, 2012*), not necessarily coinfecting  
111 the same individuals, and the evolution of tolerance to one pathogen may depend on the  
112 interaction with tolerances to others. According to the Life-History Theory, hosts may achieve  
113 tolerance to pathogens through modifications of their life-history (*Minchella, 1985; Stearns,*  
114 *1992*). These changes may respond to two contrasting mechanisms: Highly virulent pathogens  
115 will induce shorter host pre-reproductive, and longer reproductive, periods in order to produce  
116 progeny before resource depletion, castration or death. Conversely, less virulent pathogens  
117 will induce host resource reallocation from growth to reproduction, and/or a delay in host  
118 reproduction, which would allow compensating the pathogen effect on host fitness (*Hochberg*  
119 *et al., 1992; Gandon et al., 2002*). Hence, depending on the pathogen's virulence, tolerance  
120 may require markedly different, even opposed, host responses that likely are difficult to  
121 maximize simultaneously. As a consequence, trade-offs between tolerances to different  
122 pathogens might be important forces for the evolution of plant defences (*Figure 1*). Interestingly,  
123 such trade-offs have seldom been considered nor in mathematical models, or in experimental  
124 analysis (*Kutzer & Armitage, 2016; Pagán & García-Arenal 2018*).

125 To address this central question to understand how plant defences against pathogens  
126 evolve, we utilized *Turnip mosaic virus* (TuMV, *Potyviridae*) and *Cucumber mosaic virus* (CMV,  
127 *Bromoviridae*), and *Arabidopsis thaliana* (from here on "Arabidopsis", Brassicaceae). Both  
128 viruses are commonly found in wild populations of Arabidopsis at up to 80% prevalence (*Pagán*  
129 *et al., 2010*), indicating that the Arabidopsis–TuMV and Arabidopsis–CMV interactions are  
130 significant in nature. CMV infection moderately reduces seed production, rarely inducing  
131 sterility, and has little effect on plant life period (*Pagán et al., 2007,2008; Hily et al., 2016;*  
132 *Montes et al., 2019*). Thus, CMV can be considered as a moderately virulent virus. On the  
133 other hand, TuMV infection affects Arabidopsis flower and silique viability, which may severely  
134 affect plant fertility and often leads to sterility (*Sánchez et al., 2015*). Moreover, this virus  
135 greatly reduces plant life period (*Vijayan et al., 2017*). Therefore, TuMV can be regarded as a  
136 highly virulent pathogen in Arabidopsis, although milder TuMV genotypes exist (*Sánchez et al.,*  
137 *2015*). Interestingly, although both viruses have high prevalence and share common vectors  
138 (e.g., *Fujisawa, 1985*), in Arabidopsis CMV+TuMV mixed infections occurred at low frequency  
139 (*Pagán et al., 2010*), opening the possibility of evolving different tolerance responses to these  
140 two viruses that vary in virulence. Tolerance to CMV varies across Arabidopsis genotypes as  
141 a quantitative trait; and long-lived genotypes with low seed production to total biomass ratio  
142 (Group 1 genotypes) are generally more tolerant than short-lived genotypes that have high

143 seed to biomass ratio (Group 2 genotypes) (*Pagán et al., 2008; Hily et al., 2016*). Tolerance to  
144 CMV in Group 1 genotypes is attained through modifications of life-history traits, mainly the  
145 reallocation of resources from growth to reproduction and, to a lesser extent, elongation of the  
146 pre-reproductive period (*Pagán et al., 2008; Shuckla et al., 2018*). Virus-induced resource  
147 reallocation appears to be CMV-specific, and it is not triggered upon TuMV infection (*Shuckla*  
148 *et al., 2018*). However, these authors used a reduced set of Arabidopsis genotypes, and did  
149 not test virulence-specific modifications of other life-history traits that would confer tolerance,  
150 and their potential trade-offs.

151 The key variables for measuring tolerance may vary depending on each plant-pathogen  
152 interaction (*Day, 2002; Rohr et al., 2010*). For instance, pathogens may affect plant fecundity  
153 directly or through reducing survival. In plants infected by a sterilizing pathogen such as TuMV,  
154 enhanced survival may represent the difference between reproducing or dying during the  
155 growth period. Thus, considering both the effect of infection on plant progeny production  
156 (fecundity tolerance) and survival (mortality tolerance) may be equally important to understand  
157 the evolution of tolerance. Conversely, plant mortality tolerance might be less relevant upon  
158 infection with a milder pathogen such as CMV, as infected plants generally reach the adult  
159 stage and reproduce. However, in most experimental analyses of tolerance to plant pathogens  
160 host fitness was measured only as progeny production (*Pagán & García-Arenal, 2018*), and  
161 the relationship between fecundity tolerance and mortality tolerance have been seldom  
162 analysed (*Pagán et al., 2008; Shuckla et al., 2018*). Another point under debate in the literature  
163 on plant tolerance is how it is quantified. Most often, tolerance has been measured as the  
164 effect of infection at a given pathogen load (i.e., point tolerance) (*Pagán & García-Arenal,*  
165 *2018*). At odds, it has been proposed that a more informative approach is quantifying tolerance  
166 as the slope of a regression of host fitness against pathogen load (i.e., range tolerance); the  
167 steeper the slope, the lower the tolerance, which cannot be measured on a single plant but  
168 across individuals of a given host type (e.g. genotype) (*Little et al., 2010; Kutzer & Armitage,*  
169 *2016*). Notably, range tolerance to plant pathogens has been seldom analysed to date (*Pagán*  
170 *& García-Arenal, 2018*).

171 Herein, we analyse whether Arabidopsis achieves (range) tolerance to TuMV infection  
172 and if such tolerance is related to modifications of plant life-history traits. Specifically, we  
173 analysed the association between the effect of infection on plant progeny production (fecundity  
174 tolerance) and life period (mortality tolerance) with resource reallocation from growth to  
175 reproduction and with modifications in the length of the growth and reproductive periods. We  
176 also analysed resistance-tolerance trade-offs upon infection by TuMV and CMV, and if  
177 tolerance to TuMV is traded-off against tolerance to CMV.

## 178 Results

179 **Virus multiplication in Arabidopsis.** The level of UK1-TuMV, LS-CMV and JPN1-TuMV RNA  
180 accumulation was used to evaluate Arabidopsis resistance to virus infection. Accumulation  
181 differed according to the virus (Wald  $\chi^2_{2,448}=211.52$ ,  $P=1\times 10^{-4}$ ), and the interaction between  
182 virus and host genotype was significant (Wald  $\chi^2_{34,448}=475.28$ ,  $P<1\times 10^{-4}$ ). Thus, we analysed  
183 accumulation for each virus separately, considering plant genotype and allometric group as  
184 factors. For all three viruses, accumulation significantly differed between Arabidopsis  
185 genotypes (Wald  $\chi^2\geq 137.17$ ,  $P<1\times 10^{-4}$ ), but not between allometric groups (Wald  $\chi^2\leq 0.41$ ,  
186  $P\geq 0.524$ ) ([Supplementary Table S1](#)). Thus, the allometric group did not affect the level of  
187 resistance.

188 Broad-sense heritability of virus accumulation ranged from moderate to high depending  
189 on the virus:  $h^2_b=0.43$ , 0.60 and 0.68, for UK1-TuMV, LS-CMV and JPN1-TuMV, respectively  
190 ([Supplementary Table S2](#)). Therefore, there is significant genetic variation among the studied  
191 Arabidopsis genotypes for the ability to sustain virus multiplication.

192  
193 **Arabidopsis fecundity and mortality tolerance to virus infection.** Fecundity and mortality  
194 tolerances (slopes of the *SW* and *LP* to virus accumulation regression, respectively) differed  
195 depending on the virus (Wald  $\chi^2_{2,48}\geq 143.28$ ,  $P\leq 1\times 10^{-4}$ ). Both tolerance measures were  
196 smallest to UK1-TuMV and greatest to LS-CMV, with tolerances to JPN1-TuMV showing  
197 intermediate values ([Figure 2 and Supplementary Table S1](#)). The interaction between virus  
198 and Arabidopsis allometric group was also significant (Wald  $\chi^2_{2,48}\geq 24.36$ ,  $P\leq 1\times 10^{-4}$ ). Thus,  
199 fecundity and mortality tolerances were analysed for each virus independently. From here on,  
200 results will be presented firstly for the two viruses at the tolerance extremes (UK1-TuMV and  
201 LS-CMV), and lastly for the intermediate state (JPN1-TuMV).

202 In general, viruses significantly reduced Arabidopsis fecundity ( $SW_i/SW_m<1$ ) ([Figure 3](#)).  
203 Exceptions were LS-CMV-infected Cum-0 and LI-0 plants (Group 1) that overcompensated the  
204 effect of virus infection ( $SW_i/SW_m>1$ ) ([Supplementary Table S1](#)). Upon UK1-TuMV infection,  
205 fecundity tolerance varied according to the allometric group (Wald  $\chi^2_{1,16}=23.68$ ,  $P<1\times 10^{-4}$ ). The  
206 negative slope was steeper for Group 1 genotypes, with none of the infected plants producing  
207 seeds, than for Group 2 ones, with only 61.8% of sterilized plants and fertile individuals in 8/11  
208 genotypes ([Figure 2 and Supplementary Table S1](#)). Thus, Group 2 plants had higher fecundity  
209 tolerance. All LS-CMV-infected plants were fertile, with steeper negative slopes of the *SW* to  
210 virus accumulation regression for Group 2 genotypes (lower fecundity tolerance) than for  
211 Group 1 ones (Wald  $\chi^2_{1,16}=12.34$ ,  $P<1\times 10^{-4}$ ). At odds with UK1-TuMV and LS-CMV infected  
212 plants, in JPN1-TuMV-infected plants the slope of the *SW* to virus accumulation regression did  
213 not differ between allometric groups (Wald  $\chi^2_{1,16}=0.83$ ,  $P=0.362$ ). However, Group 1 genotypes

214 showed a bimodal response: In Cum-0, Kas-0 and LI-0 (Subgroup 1a), 50-70% of infected  
215 individuals were sterilized and regression slopes were steep. Conversely, infected Cad-0,  
216 Cdm-0, Kas-2 and Kyo-1 plants (Subgroup 1b) produced seeds and regression slope were  
217 shallower than for Subgroup 1a (Wald  $\chi^2_{1,5}=46.19$ ,  $P<1\times 10^{-4}$ ) (Figure 2 and Supplementary  
218 Table S1). Group 2 genotypes, where 92% of infected plants produced seeds, showed  
219 intermediate and significantly different slope values than the two Group 1 subsets (Wald  $\chi^2_{1,6}\geq$   
220 4.61,  $P\leq 0.040$ ) (Figure 2).

221 UK1-TuMV also reduced plant survival ( $LP_i/LP_m<1$ ) (Figure 3), with mortality tolerance  
222 differing between allometric groups (Wald  $\chi^2_{1,16}=29.69$ ,  $P=1\times 10^{-4}$ ). Mortality tolerance was  
223 smaller (steeper negative slope of the  $LP$  to virus accumulation regression) for Group 1 than  
224 for Group 2 plants (Wald  $\chi^2_{1,16}=29.69$ ,  $P=1\times 10^{-4}$ ) (Figure 2). In contrast, LS-CMV infection had  
225 little effect on Arabidopsis survival: No differences between allometric groups were observed  
226 in the slope of the  $LP$  to virus accumulation regression (Wald  $\chi^2_{1,16}=0.02$ ,  $P=0.900$ ), indicating  
227 similar mortality tolerance, with very little effect of virus infection on  $LP$  as denoted by  $LP_i/LP_m$   
228 values near one (Figures 2 and 3). As for JPN1-TuMV-infected plants, mortality tolerance did  
229 not vary between allometric groups (Wald  $\chi^2_{1,16}=1.25$ ,  $P=0.263$ ). However, again Group 1  
230 plants presented a bimodal response to infection: the slope of the  $LP$  to virus accumulation  
231 regression was significantly steeper in Subgroup 1a than in Subgroup 1b (Wald  $\chi^2_{1,5}=14.25$ ,  
232  $P=1\times 10^{-3}$ ) and in Group 2 genotypes (Wald  $\chi^2_{1,13}=8.34$ ,  $P=0.004$ ), which showed similar  
233 mortality tolerance (Wald  $\chi^2_{1,13}=0.83$ ,  $P=0.363$ ), (Figure 2 and Supplementary Table S1). Note  
234 that upon infection by UK1-TuMV and LS-CMV Group 1 genotypes did not show this bimodal  
235 distribution (Wald  $\chi^2_{1,6}\leq 0.49$ ,  $P\geq 0.483$ ) (Supplementary Table S1).

236 Because fecundity and mortality tolerances are genotype-specific rather than plant-  
237 specific variables, by definition heritability for these traits could not be calculated.

238

239 **Relationship between modifications of Arabidopsis life-history traits and tolerance to**  
240 **virus infection.** For each virus, the effect of infection on Arabidopsis growth and reproduction  
241 was quantified as the ratios of rosette, inflorescence and seed weights between infected and  
242 mock-inoculated plants ( $RW_i/RW_m$ ,  $IW_i/IW_m$  and  $SW_i/SW_m$ , respectively) (Figure 3A-C and  
243 Supplementary Table S1). In general, virus infection reduced  $RW$ ,  $IW$  and  $SW$  (Wald  $\chi^2_{1,68}\geq 49.52$ ;  
244  $P<1\times 10^{-4}$ ), this reduction always depending on the Arabidopsis genotype (Wald  $\chi^2_{1,68}\geq 388.79$ ;  
245  $P<1\times 10^{-4}$ ). For UK1-TuMV-infected plants, all ratios also depended on the allometric group  
246 (Wald  $\chi^2_{1,168}\geq 25.87$ ;  $P<1\times 10^{-4}$ ). In groups 1 and 2,  $RW_i/RW_m$  was greater than  $IW_i/IW_m$  (Wald  
247  $\chi^2_{1,168}\geq 20.04$ ;  $P<1\times 10^{-4}$ ) and  $SW_i/SW_m$  (Wald  $\chi^2_{1,168}\geq 50.20$ ;  $P<1\times 10^{-4}$ ) suggesting no resource  
248 reallocation from growth to reproduction. Indeed,  $(IW/RW)_i/(IW/RW)_m$  and

249  $(SW/RW)_i/(SW/RW)_m$  were always smaller than one (Wald  $\chi^2_{1,168} \geq 21.35$ ,  $P < 1 \times 10^{-4}$ ) (Figure 3G  
250 and Supplementary Table S1). The effect of LS-CMV on  $RW$  and  $SW$  (Wald  $\chi^2_{1,163} \geq 4.33$ ,  
251  $P \leq 0.037$ ), but not on  $IW$  (Wald  $\chi^2_{1,163} = 1.955$ ,  $P = 0.162$ ), varied according to the allometric group.  
252 For Group 1, the effect of LS-CMV infection on  $RW$  was larger than on  $SW$  (Wald  $\chi^2_{1,49} = 10.89$ ,  
253  $P = 1 \times 10^{-3}$ ), whereas the opposite was observed in Group 2 (Wald  $\chi^2_{1,102} = 13.90$ ,  $P = 2 \times 10^{-4}$ ).  
254  $(SW/RW)_i/(SW/RW)_m$  differed between allometric groups (Wald  $\chi^2_{1,163} = 11.77$ ,  $P < 1 \times 10^{-4}$ ),  
255 values being greater than one only for Group 1 (Wald  $\chi^2_{1,60} = 7.11$ ,  $P = 0.008$ ) (Figure 3H and  
256 Supplementary Table S1). Similar trends were observed in JPN1-TuMV-infected plants (Figure  
257 3C), for which  $(IW/RW)_i/(IW/RW)_m$  (Wald  $\chi^2_{1,161} = 2.66$ ,  $P = 0.003$ ) and  $(SW/RW)_i/(SW/RW)_m$   
258 (Wald  $\chi^2_{1,161} = 17.18$ ,  $P < 1 \times 10^{-4}$ ) were also greater for Group 1 than for Group 2 plants, values  
259 being similar or greater than one only for Group 1 (Figure 3I and Supplementary Table S1).  
260 These results would be compatible with resource reallocation from growth to reproduction in  
261 LS-CMV- and JPN1-TuMV-infected Group 1 plants. Again, JPN1-TuMV-infected Group 1  
262 genotypes showed a bimodal distribution:  $RW_i/RW_m$ ,  $IW_i/IW_m$  and  $SW_i/SW_m$  were smaller for  
263 Subgroup 1a than for Subgroup 1b (Wald  $\chi^2_{1,161} \geq 5.65$ ,  $P \leq 0.017$ ) (Figure 3C), and the same  
264 was observed for  $(SW/RW)_i/(SW/RW)_m$  (Wald  $\chi^2_{1,161} = 5.76$ ,  $P = 0.016$ ) (Figure 3I). This ratio was  
265 greater than one only for Subgroup 1b genotypes (Wald  $\chi^2_{1,35} = 80.95$ ,  $P < 1 \times 10^{-4}$ ), indicating that  
266 resource reallocation was associated with fecundity tolerance in this subgroup (Figure 3I and  
267 Supplementary Table S1).

268 We also quantified the effect of infection on the plant growth, reproductive and post-  
269 reproductive periods ( $GP_i/GP_m$ ,  $RP_i/RP_m$  and  $PRP_i/PRP_m$ , respectively) (Figure 3D-F and  
270 Supplementary Table S1). Upon UK1-TuMV infection,  $GP_i/GP_m$  depended on the allometric  
271 group (Wald  $\chi^2_{1,166} = 17.95$ ,  $P < 1 \times 10^{-4}$ ), this ratio being smaller for Group 1 than for Group 2  
272 plants. Interestingly, in Group 2 genotypes the effect of infection on  $GP$  was greater than the  
273 effect on  $RP$  (Wald  $\chi^2_{1,39} = 52.46$ ,  $P < 1 \times 10^{-4}$ ):  $GP_i/GP_m$  was significantly smaller (Wald  
274  $\chi^2_{1,39} = 9.73$ ,  $P = 0.002$ ), and  $RP_i/RP_m$  greater (Wald  $\chi^2_{1,39} = 7.55$ ,  $P = 0.006$ ), than one. Thus, upon  
275 UK1-TuMV infection more tolerant Group 2 genotypes shortened their growth period but  
276 elongated the time dedicated to reproduction, as indicated by  $(RP/GP)_i/(RP/GP)_m$  values  
277 greater than one in this subgroup (Figure 3G and Supplementary Table S1). Note that in Group  
278 1 genotypes  $RP$  and  $PRP$  could not be quantified because plants did not produce mature  
279 siliques (Figure 3D and Material and Methods). On the other hand, LS-CMV infection did not  
280 affect  $GP$ ,  $RP$  and  $PRP$  (Wald  $\chi^2_{1,166} \leq 1.94$ ,  $P \geq 0.164$ ) their ratios being always near one in both  
281 allometric groups (Wald  $\chi^2 \leq 0.76$ ,  $P \geq 0.383$ ) (Figure 3E). Accordingly,  $(RP/GP)_i/(RP/GP)_m$  and  
282  $(PRP/GP)_i/(PRP/GP)_m$  were also near one (Wald  $\chi^2 \leq 2.47$ ,  $P \geq 0.116$ ) (Figure 3H and  
283 Supplementary Table S1). Exception to this rule was Subgroup 1a, which included Arabidopsis



284 genotypes that overcompensated the effect of LS-CMV infection on *SW*. These genotypes  
285 significantly elongated *GP*, as indicated by  $GP_i/GP_m$  values higher (Wald  $\chi^2_{1,59}=11.885$ ,  
286  $P=6\times 10^{-4}$ ), and  $(RP/GP)_i/(RP/GP)_m$  and  $(PRP/GP)_i/(PRP/GP)_m$  values smaller (Wald  
287  $\chi^2_{1,59}\geq 6.77$ ,  $P\leq 0.009$ ), than one. Finally, in JPN1-TuMV-infected plants  $GP_i/GP_m$ ,  $RP_i/RP_m$  and  
288  $PRP_i/PRP_m$  did not depend on the allometric group (Wald  $\chi^2_{1,166}\leq 0.88$ ,  $P\geq 0.349$ ) (Figure 3F  
289 and Supplementary Table S1). Also,  $(RP/GP)_i/(RP/GP)_m$  and  $(PRP/GP)_i/(PRP/GP)_m$  did not  
290 differ between groups 1 and 2 and showed values smaller than one (Wald  $\chi^2\leq 0.52$ ,  $P\geq 0.470$ )  
291 (Figure 3I and Supplementary Table S1). The effect of infection on all plant developmental  
292 traits was similar in subgroups 1a and 1b (Wald  $\chi^2_{1,166}\leq 3.77$ ,  $P\geq 0.070$ ).

293 In summary, *Arabidopsis* fecundity and mortality tolerances to UK1-TuMV are  
294 associated with modifications of the plant developmental schedule, whereas fecundity  
295 tolerance to LS-CMV and JPN1-TuMV is accompanied by resource reallocation from growth  
296 to reproduction. Interestingly, broad-sense heritability of the effect of UK1-TuMV infection on  
297 *GP*, *RP* and *PRP* was higher than that of the effect of infection on *RW* and *IW* ( $h^2_b=0.58-0.83$   
298 vs. 0.40-0.58), whereas the opposite was observed for LS-CMV and JPN1-TuMV infected  
299 plants ( $h^2_b=0.17-0.39$  vs. 0.38-0.41 and 0.50-0.61 vs. 0.68-0.87, respectively) (Supplementary  
300 Table S2). Thus, the plant life-history traits associated with the tolerance response to a given  
301 virus have higher host dependency than those not related to tolerance to that particular virus.

302  
303 **Trade-offs between *Arabidopsis* defences to virus infection.** To analyse *Arabidopsis*  
304 resistance-tolerance trade-offs to each virus, bivariate relationships between virus  
305 accumulation and the slope of the *SW* and *LP* to virus accumulation regression were explored,  
306 a significantly negative association indicating a trade-off. No significantly negative association  
307 was observed between resistance and the two measures of tolerance for any of the three  
308 viruses, neither using the whole set of plant genotypes ( $r\leq 0.23$ ;  $P\geq 0.367$ ), nor for each  
309 allometric group ( $r\leq 0.40$ ;  $P\geq 0.223$ ).

310 We used the same approach to analyse fecundity tolerance-tolerance trade-offs  
311 (Figure 4A-C). Bivariate analyses indicated a negative relationship between fecundity  
312 tolerance to UK1-TuMV and to LS-CMV ( $r=-0.62$ ;  $P=0.007$ ). No association was found between  
313 fecundity tolerance to UK1-TuMV and to JPN1-TuMV ( $r=-0.20$ ;  $P=0.418$ ), but this was just due  
314 to the three Subgroup 1a genotypes ( $r=-0.90$ ;  $P<1\times 10^{-4}$ ). Finally, no association was detected  
315 between fecundity tolerance to JPN1-TuMV and LS-CMV ( $r=0.25$ ;  $P=0.325$ ), but again removal  
316 of Subgroup 1a genotypes resulted in a positive association ( $r=0.65$ ;  $P=0.001$ ) (Figure 4A-C).  
317 Because our previous results strongly suggested that trade-offs between tolerance to different  
318 viruses were linked to plant allometry, we also analysed such trade-offs by GzLMs virus  
319 pairwise comparisons of the slope of the *SW* to virus accumulation regression considering

320 virus and allometric group as factors. A significant interaction was taken as indicative of a  
321 tolerance-tolerance trade-off. When fecundity tolerance upon UK1-TuMV infection was  
322 compared with that upon infection by the other two viruses, a significant virus per allometric  
323 group interaction was observed (Wald  $\chi^2_{1,34} \geq 35.12$ ,  $P < 1 \times 10^{-4}$ ). On the other hand, the virus  
324 genotype per allometric group interaction was not significant when comparing JPN1-TuMV and  
325 LS-CMV (Wald  $\chi^2_{1,34} = 1.87$ ,  $P = 0.275$ ) (Figure 2A). Given the bimodal distribution of fecundity  
326 tolerance in Group 1 JPN1-TuMV infected plants, we also performed pairwise comparisons  
327 considering subgroups 1a and 1b. When fecundity tolerance upon UK1-TuMV and LS-CMV  
328 infection was compared between subgroups 1a and 1b, and Group 2, a significant interaction  
329 between factors was observed (Wald  $\chi^2_{1,28} \geq 24.89$ ,  $P < 1 \times 10^{-4}$ ) (Figure 2A). The comparison of  
330 JPN1-TuMV and LS-CMV infected plants yielded a significant interaction only between  
331 Subgroup 1a and Group 2 (Wald  $\chi^2_{1,28} = 12.34$ ,  $P = 4 \times 10^{-4}$ ) (Figures 2A). Conversely, the  
332 comparison of UK1-TuMV and JPN1-TuMV infected plants indicated a significant interaction  
333 between virus genotype and plant allometry for the combination of Subgroup 1b and Group 2  
334 (Wald  $\chi^2_{1,28} = 35.97$ ,  $P < 1 \times 10^{-4}$ ) (Figure 2A). Altogether, these results indicate trade-offs  
335 between fecundity tolerance to UK1-TuMV and to the other two viruses.

336 Bivariate analyses indicated a significant negative association between mortality  
337 tolerance to UK1-TuMV and to LS-CMV ( $r = -0.51$ ;  $P = 0.044$ ), and between tolerance to UK1-  
338 TuMV and to JPN1-TuMV when excluding Subgroup 1a genotypes ( $r = -0.56$ ;  $P = 0.031$ ). No  
339 significant association was observed between mortality tolerance to JPN1-TuMV and to LS-  
340 CMV ( $r = 0.12$ ;  $P = 0.627$ ) even excluding Subgroup 1a genotypes (Figure 4D-F). In addition, the  
341 comparison of slope of the *LP* to virus accumulation regression between plants infected by  
342 UK1-TuMV and by the other two viruses showed a significant virus per allometric group  
343 interaction (Wald  $\chi^2 \geq 29.69$ ,  $P < 1 \times 10^{-4}$ ), whereas no such interaction was detected between  
344 JPN1-TuMV and LS-CMV (Wald  $\chi^2_{1,34} = 1.26$ ,  $P = 0.261$ ) (Figure 2B). When Group 1 plants were  
345 divided into Subgroups 1a and 1b, the only significant interaction was between Subgroup 1b  
346 and Group 2 genotypes for comparisons of mortality tolerance to UK1-TuMV and JPN1-TuMV  
347 (Wald  $\chi^2_{1,29} = 22.35$ ,  $P < 1 \times 10^{-4}$ ) (Figure 2B). These results indicate trade-offs between mortality  
348 tolerance to UK1-TuMV and to the other two viruses.

349 For each virus, we also analysed potential mortality-fecundity tolerance trade-offs. No  
350 significant bivariate associations were found when considering all plant genotypes together, or  
351 each allometric group separately in any of the three viruses ( $r \leq 0.64$ ;  $P \geq 0.119$ ). Exception were  
352 UK1-TuMV infected plants when analysed as a whole, in which both tolerances showed a  
353 positive association ( $r = 0.57$ ;  $P = 0.013$ ). Thus, when associated, higher mortality tolerance  
354 increases fecundity tolerance to a given virus.

355

356

## 357 **Discussion**

358 Accumulating evidence indicates that tolerance is as widespread as resistance as a plant  
359 defence strategy, and therefore central to understand plant-pathogen (including plant-virus)  
360 interactions. However, the mechanisms by which tolerance is achieved and the forces shaping  
361 its evolution are still poorly understood (*Baucom & de Roode, 2011; Pagán & García-Arenal,*  
362 *2018*). Using plant-virus interactions, we tested the hypotheses that tolerances to pathogens  
363 with different virulence levels are associated with modifications of different plant life-history  
364 traits, and that the evolution of tolerance to a given pathogen depends on trade-offs established  
365 with the level of tolerance to others.

366 We showed that *Arabidopsis* displays genotype-specific fecundity tolerance to the  
367 highly virulent virus UK1-TuMV, with plants of the allometric Group 2 having higher tolerance  
368 than Group 1 ones. In *Arabidopsis*, UK1-TuMV infection often prevents seed production  
369 (*Sánchez et al., 2015; Vijayan et al., 2017*; this work), such that this virus can be considered  
370 as a sterilizing pathogen. Because sterilizing pathogens have an enormous impact on the host  
371 fitness, hosts are expected to evolve defences against this type of pathogens (*Lafferty & Kuris,*  
372 *2009*). Theoretical models on the evolution of host defences predict that infection by a  
373 sterilizing pathogen promotes tolerance rather than resistance. Resistance restricts pathogen  
374 multiplication and, through repeatedly paying the price to control the pathogen's growth,  
375 resistance would come at infinite cost. Conversely, tolerance would compensate the effect of  
376 infection without attempting to control pathogen's multiplication, thus being less costly (*Restif*  
377 *& Koella, 2004; Best et al., 2010*). Although we did not analyse the costs of resistance and  
378 tolerance, our results would support this prediction in that *Arabidopsis* evolves tolerance to a  
379 sterilizing virus rather than resistance: Firstly, half of the *Arabidopsis* genotypes were not  
380 sterilized by UK1-TuMV regardless of virus multiplication, which by definition increases  
381 tolerance. Secondly, the level of resistance did not relate with plant fitness, and extreme  
382 resistance (immunity) was not detected, indicating that resistance is not associated with the  
383 effect of UK1-TuMV on progeny production.

384 It should be noted that upon UK1-TuMV infection, infected plants of tolerant  
385 *Arabidopsis* genotypes produced on average 30% of the seeds produced by mock individuals.  
386 It could be argued that this level of fecundity tolerance is not effective, i.e., seed production of  
387 infected plants is far from that of uninfected ones (*Shuckla et al., 2018*). However,  
388 mathematical models on the evolution of tolerance to sterilizing pathogens predict that optimal  
389 levels of tolerance will not surpass 50% of the progeny produced by uninfected individuals,  
390 regardless of tolerance being modelled as a function of host mortality, lifespan or transmission  
391 rate (*Restif & Koella, 2004; Hall et al., 2007; Best et al., 2010*). Even if we consider 30% of  
392 progeny production upon UK1-TuMV infection as a low level of fecundity tolerance, it would be

393 selectively advantageous for Arabidopsis, as it makes the difference between leaving progeny  
394 or not. Indeed, various models showed that this level of fecundity tolerance drives the host  
395 population out of the pathogen-driven extinction margins, especially at high levels of pathogen  
396 prevalence (*Boots & Sasaki, 2002; Antonovics, 2009*). Accordingly, experimental analyses in  
397 other host-sterilizing pathogen interactions reported similar fecundity tolerance levels  
398 (*Fredensborg & Poulin, 2006; Vale & Little, 2012*). It is relevant to mention that Arabidopsis  
399 fecundity and mortality tolerances to UK1-TuMV were positively associated, whereas upon  
400 infection by milder viruses they were not. This observation would agree with models predicting  
401 that, for highly virulent parasites, fecundity tolerance is a saturating function of mortality  
402 tolerance (*Best et al., 2010*), provided that our data is in the linear part of the curve. Altogether,  
403 to our knowledge these results would represent the first example of plant tolerance to a  
404 sterilizing virus.

405 Fecundity tolerance to UK1-TuMV was associated with genotype-specific modifications  
406 of the plant developmental schedule. Particularly, upon UK1-TuMV infection more fecundity-  
407 tolerant Group 2 genotypes showed shorter growth, and longer reproductive, periods than  
408 mock-inoculated plants. This observation agrees with the prediction of the Life-History Theory  
409 that bringing forward the age at maturity allows infected hosts to reproduce before they  
410 experience the full cost of infection, thus compensating (at least partly) the effect on host  
411 fitness (*Hochberg et al., 1992; Gandon et al., 2002*). These results are also in agreement with  
412 experimental analyses of life-history modifications upon infection by highly virulent parasites  
413 in animals (e.g., *Agnew et al., 2000; Ebert et al., 2004; Fredensborg and Poulin, 2006*).  
414 Bringing forward the age at maturity may have important consequences for Arabidopsis  
415 population dynamics. Early progeny production would allow seeds from infected plants to  
416 germinate and occupy the most suitable niches before uninfected individuals produce theirs,  
417 which represents a competitive advantage (*Akiyama & Agren, 2014; Gioria et al., 2018*). This  
418 could contribute to compensate the smaller progeny production of infected plants, provided  
419 that virus infection does not affect seed viability as shown here. Shorter growth, and longer  
420 reproductive, periods of Group 2 genotypes were also associated with higher mortality  
421 tolerance to UK1-TuMV. It has been proposed that larger host growth periods caused by  
422 pathogen-mediated sterilization allows the storage of reproduction-liberated resources into  
423 host growth until the pathogen can exploit them (*Jaenike, 1996; O'Keefe & Antonovics, 2002*).  
424 This hypothesis is based on the assumption that host resources can be allocated to either host  
425 or pathogen reproduction. Thus, resources dedicated to host reproduction become unavailable  
426 for pathogen growth, reducing the effects of infection. This would be the case for the  
427 Arabidopsis-UK1-TuMV interaction: Early age at maturity of Group 2 genotypes and  
428 subsequent reproduction would reduce the resources available for virus multiplication,  
429 limiting/delaying the full cost of infection on plant survival.

430 Arabidopsis fecundity tolerance to LS-CMV was higher in Group 1 than in Group 2  
431 genotypes, which was associated with resource reallocation from growth to reproduction, an  
432 extensively studied response (*Pagán et al. 2007,2008,2009, Hily et al., 2014,2016; Shuckla et*  
433 *al., 2018*). Notably, our results are in agreement with these previous works even if we  
434 quantified tolerance as the slope of the fitness to virus load regression rather than at a single  
435 pathogen load, and support the Life-History Theory prediction that hosts would evolve  
436 tolerance to milder pathogens (as CMV) through resource reallocation from growth to  
437 reproduction (*Hochberg et al. 1992; Gandon et al. 2002*). Thus, it could be concluded that  
438 Arabidopsis tolerance to plant virus infection is virulence-dependent, which is another  
439 prediction of the Life-History Theory. However, our results could be also explained if  
440 Arabidopsis life-history trait modifications were virus species-specific, rather than depend on  
441 virulence. Indeed, using six Arabidopsis genotypes *Shuckla et al., (2018)* concluded that  
442 fecundity tolerance through resource reallocation was specific to CMV, but these authors only  
443 considered a highly virulent TuMV isolate. The effect of a milder TuMV genotype (JPN1-TuMV)  
444 on Arabidopsis might shed light on this question. Upon JPN1-TuMV infection, half of the Group  
445 1 genotypes showed higher mortality and fecundity tolerances than Group 2 genotypes, all  
446 infected plants being fertile, and tolerance being associated with resource reallocation from  
447 growth to reproduction. In the other half of Group 1 genotypes, JPN1-TuMV sterilized over  
448 50% of the plants and no tolerance response was observed. Therefore, Arabidopsis Group 1  
449 genotypes in which JPN1-TuMV infection has lower virulence display similar responses to  
450 those observed upon LS-CMV infection, whereas in plant genotypes for which JPN1-TuMV  
451 virulence is higher the effect of infection resembles to that of UK1-TuMV. This strongly  
452 suggests that tolerance is virulence-dependent rather than virus-specific. Note that the  
453 subdivision of Group 1 genotypes resulted in 3 to 4 genotypes per subgroup, and the generality  
454 of our observations should be validated in a larger number of Arabidopsis genotypes, and in  
455 other pathogens and hosts.

456 We failed in finding a negative association between plant resistance and tolerance to  
457 the same virus across Arabidopsis genotypes, which indicates the absence of trade-offs  
458 between these two defence mechanisms. On the other hand, Arabidopsis could not optimize  
459 at the same time tolerances to viruses displaying different virulence levels (negative  
460 association between these tolerances), with LS-CMV and JPN1-TuMV (lower virulence)  
461 inducing different and mutually exclusive life-history modifications than UK1-TuMV (higher  
462 virulence). A number of experimental works reported that pathogen-driven changes in host life-  
463 history traits can be either genetically determined or the consequence of phenotypic plasticity  
464 (*Michalakis & Hochberg, 1994; Schlichting & Pigliucci, 1998; McLeod & Day, 2015*). Thus, it  
465 could be hypothesized that one or both of these two types of determinisms may be involved in  
466 the observed tolerance-tolerance trade-offs. Our data indicates that trade-offs are influenced

467 by two main factors: (i) Virus virulence: Plant genotypes showed different responses in different  
468 environments (i.e., virulence levels), which is indicative of phenotypic plasticity (*Michalakis &*  
469 *Hochberg, 1994*). (ii) Plant allometry: Group 1 genotypes showed tolerance to less virulent  
470 viruses through resource reallocation, whereas Group 2 genotypes showed tolerance to the  
471 most virulent one by altering plant development. Arabidopsis Group 1 genotypes have bigger  
472 rosettes and smaller inflorescences than Group 2 ones. That is, in Group 1 genotypes most  
473 resources are diverted into growth, whereas in Group 2 resources are primarily dedicated to  
474 reproduction. Hence, Group 1 plants would have a relatively wide margin to reallocate growth  
475 resources into reproduction; this margin being much narrower, and therefore less efficient, for  
476 Group 2 genotypes. In addition, bringing forward the age at maturity requires accelerated  
477 rosette growth rates, as Arabidopsis needs to reach a minimum rosette size to flower (*Méndez-*  
478 *Vigo et al., 2010*). Group 1 genotypes typically show faster rosette growth rates (*Hily et al.,*  
479 *2016*), and therefore have less margin to accelerate it, than Group 2 genotypes. Thus, the two  
480 allometric groups have particular characteristics that are genetically determined (*Manzano-*  
481 *Piedras et al., 2014*), and that could influence the evolution of tolerance. In support of this  
482 genetic determinism, our results indicated that heritability in tolerance-related plant traits was  
483 always medium-high. Therefore, although fecundity tolerance is a phenotypically plastic  
484 response, the type of response depends on the genetic background of the plant, and tolerance-  
485 tolerance trade-offs likely have both genetic and phenotypic plasticity components. This  
486 combination of phenotypic plasticity and genetic determinism for tolerance has been also  
487 shown in response to other factors such as the moment of plant inoculation, light, temperature  
488 and plant density (*Pagán et al. 2007,2009; Hily et al., 2016; Montes & Pagán, 2019*), factors  
489 that would modulate the tolerance-tolerance trade-offs observed here, which would be an  
490 interesting avenue for future research.

491 Tolerance-tolerance trade-offs may have important implications for understanding the  
492 evolution of host defences. To date, most mathematical models on this subject are built on the  
493 assumption that tolerance evolves in single-host-pathogen interactions (*Kutzer & Armitage,*  
494 *2016; Pagán & García-Arenal, 2018*). These models predict that tolerance would be selectively  
495 advantageous for both the host and the pathogen, as tolerance will increase its prevalence,  
496 such that genes conferring tolerance will become fixed in the host population (*Rausher, 2001;*  
497 *Råberg et al., 2009*). This is generally applicable to mortality tolerance because it increases  
498 the infectious period but would only apply to fecundity tolerance if the pathogen is vertically  
499 transmitted (*Best et al., 2008*). In Arabidopsis, CMV and TuMV are seed-transmitted (*Pagán*  
500 *et al. 2014; Montes & Pagán, 2019*). However, our results suggest polymorphisms for both  
501 fecundity and mortality tolerance. Increasing evidence indicate that in nature host populations  
502 are invaded by more than one pathogen, occurring in single and mixed infections (*Syller, 2012*).  
503 Thus, host defences often evolve in a multi-pathogen context. Our results indicate that, in this

504 scenario, the evolution of both fecundity and mortality tolerance to a given virus comes at the  
505 cost of higher susceptibility to other(s), which may impose a selection pressure on tolerance  
506 and prevent fixation. Hence, more realistic analyses on the evolution of host defences should  
507 consider the combined effects of more than one pathogen, and not necessarily in coinfection.

508

## 509 **Materials and methods**

510 **Viruses and Arabidopsis genotypes.** Viruses UK1-TuMV (Acc.N. AB194802), JPN1-TuMV  
511 (Acc.N. KM094174), and LS-CMV (Acc.N. AF127976) were used. JPN1-TuMV was obtained  
512 from a field-infected plant of *Raphanus sativus* (Brassicaceae) and propagated in *Nicotiana*  
513 *benthamiana* plants. UK1-TuMV and LS-CMV were derived from biologically active clones  
514 ([Zhang et al., 1994](#); [Sánchez et al., 1998](#)) by *in vitro* transcription with T7 RNA polymerase  
515 (New England Biolabs, Ipswich, USA), and transcripts were used to infect *N. benthamiana*  
516 plants for virus multiplication. We used a single CMV isolate because previous analyses  
517 indicated that, in Arabidopsis, the fraction of the variance in virulence/tolerance explained by  
518 the CMV isolate is very low (4%) ([Pagán et al., 2007](#)), which is not the case for TuMV. Indeed,  
519 UK1-TuMV and JPN1-TuMV have different levels of virulence in Arabidopsis ([Sánchez et al.,](#)  
520 [2015](#); [Montes & Pagán, 2019](#)). This allowed exploring whether variation in tolerance to TuMV  
521 and CMV were species-specific or virulence-dependent.

522 We used ten genotypes representing the Eurasian geographic distribution of the  
523 species and eight representing its distribution in the Iberian Peninsula, a Pleistocene glacial  
524 refuge for Arabidopsis ([Sharbel et al., 2000](#)) ([Table 1](#)). Seeds were stratified for seven days at  
525 4°C in 15cm-diameter pots, 0.43l volume containing 3:1, peat:vermiculite mix. Afterwards, pots  
526 were moved for seed germination and plant growth to a greenhouse at 22°C, 16h light  
527 (intensity: 120-150 mol s/m<sup>2</sup>), with 65-70% relative humidity. In these conditions, plant  
528 genotypes conformed two allometric groups ([Table 1 and Supplementary Figure S1](#)) as  
529 previously described ([Pagán et al., 2008](#)). Because plant allometry has been repeatedly  
530 reported as a relevant factor to understand Arabidopsis tolerance to virus infection ([Pagán &](#)  
531 [García-Arenal, 2018](#)), allometric group was considered as a factor in all analyses. Plants were  
532 mechanically inoculated, either with *N. benthamiana* TuMV- and CMV-infected tissue ground  
533 in 0.1M Na<sub>2</sub>HPO<sub>4</sub>+0.5M NaH<sub>2</sub>PO<sub>4</sub>+0.02% DIECA, or with inoculation buffer for mock-  
534 inoculated plants. Inoculations were done when plants were at developmental stages 1.05-  
535 1.06 ([Boyes et al., 2001](#)). After inoculation, all individuals were randomized in the greenhouse.  
536 For each Arabidopsis genotype, seven to ten plants per virus were inoculated, and other seven  
537 were mock inoculated.

538

539 **Quantification of virus multiplication.** Virus multiplication was quantified as viral RNA  
540 accumulation 15 days post-inoculation via qRT-PCR and was used as a measure of plant

541 resistance to virus infection. For each plant, four leaf disks of 4mm in diameter from four  
542 systemically-infected rosette leaves were collected. Total RNA extracts were obtained using  
543 TRIzol® reagent (Life Technologies, Carlsbad, USA), and 0.32ng of total RNA were added to  
544 the Brilliant III Ultra-Fast SYBR Green qRT-PCR Master Mix (Agilent Technologies, Santa  
545 Clara, USA) according to manufacturer's recommendations. Specific primers were used to  
546 amplify a 70nt fragment of the TuMV, and a 106nt fragment of the CMV, coat protein (CP)  
547 gene, respectively ([Lunello et al., 2007](#); [Hily et al., 2014](#)). Each sample was assayed by  
548 triplicate on a Light Cycler 480 II real-time PCR system (Roche, Indianapolis, USA). Absolute  
549 viral RNA accumulation was quantified as ng of viral RNA/μg of total RNA utilizing internal  
550 standards. For the two TuMV isolates, internal standards consisted in ten-fold dilution series  
551 of plasmid-derived RNA transcripts of the same 70nt CP fragment from UK1-TuMV. For LS-  
552 CMV, ten-fold dilution series were prepared using purified viral RNA. Internal standards ranged  
553 from  $2 \times 10^{-3}$ ng to  $2 \times 10^{-7}$ ng.

554  
555 **Effect of infection on plant growth and reproduction.** Aboveground plant structures were  
556 harvested at complete senescence. The weights of the rosette (*RW*), inflorescence (*IW*), and  
557 seeds (*SW*) were obtained. *RW* was used to estimate plant resources dedicated to growth,  
558 and *IW* and *SW* were utilized to estimate plant resources dedicated to reproduction ([Thompson  
559 & Stewart, 1981](#)). The effect of virus infection on these traits was quantified by calculating  
560 infected to mock-inoculated plants ratios for each of them, dividing the value of each infected  
561 plant by the mean value of the mock-inoculated plants of the same genotype ( $Trait_i/Trait_m$ , *i*  
562 and *m* denoting infected and mock-inoculated plants, respectively). Following [Pagán et al.,  
563 \(2008\)](#), resource reallocation from growth to reproduction upon virus infection was analysed  
564 by calculating  $(IW/RW)_i/(IW/RW)_m$  and  $(SW/RW)_i/(SW/RW)_m$  ratios. Values of these ratios  
565 greater than one were considered as indicative of such resource reallocation. Seed viability,  
566 estimated as per cent germination, did not significantly differ between mock-inoculated (93.0-  
567 99.3%) and infected (91.0-99.7%) plants ( $\chi^2 \leq 2.16$ ;  $P \geq 0.096$ ). Also, virus infection did not affect  
568 the weight of a single seed (Wald  $\chi^2 \leq 0.99$ ;  $P \geq 0.110$ ) ([Supplementary Table 3](#)). Thus, *SW*  
569 similarly reflects the number of viable seeds in both mock-inoculated and infected plants.

570  
571 **Effect of infection on plant development.** We recorded growth period (*GP*), as days from  
572 inoculation to the opening of the first flower; reproductive period (*RP*), as days from the opening  
573 of the first flower to the shattering of the first silique; and plant post-reproductive period (*PRP*),  
574 as days from the shattering of the first silique to plant senescence. In *Arabidopsis*, the opening  
575 of the first flower co-occurs with the end of the rosette growth, and the shattering of the first  
576 silique co-occurs with the end of flower production ([Boyes et al., 2001](#)). The total life period



577 (*LP*) was quantified as the sum of the three periods. The effect of virus infection on *GP*, *RP*  
578 and *PRP*, was quantified as infected to mock-inoculated plants ratios. The  $(RP/GP)_i/(RP/GP)_m$   
579 and  $(PRP/GP)_i/(PRP/GP)_m$  ratios were used to analyse virus-induced alterations of plant  
580 development.

581

582 **Tolerance measure.** Following [Little et al., \(2010\)](#) and [Råberg \(2014\)](#), range fecundity and  
583 mortality tolerances of each *Arabidopsis* genotype were calculated as the slope of the linear  
584 regression of *SW* and *LP*, respectively, to virus accumulation considering both infected and  
585 mock-inoculated plants.

586

587 **Statistical analysis.** Analysed traits were not normally distributed, and variances were  
588 heterogeneous. Therefore, differences between viruses, plant genotypes and allometric  
589 groups/subgroups were analysed by Generalized Linear Mixed Models (GzLMMs) considering  
590 virus as fixed factor, and *Arabidopsis* genotype as random factor, which was nested to  
591 allometric group/subgroup (considered as fixed factor). Trade-offs between resistance,  
592 fecundity tolerance and mortality tolerance were analysed using Spearman's test. Tolerance-  
593 tolerance trade-offs according to virus and plant allometric group/subgroup were analysed  
594 using Generalized Linear Models (GzLMs), considering both as fixed factors. Broad-sense  
595 heritability was estimated as  $h^2_b = V_G/(V_G + V_E)$ , where  $V_G$  is the among-genotypes variance  
596 component and  $V_E$  is the residual variance. Variance components were determined using  
597 GzLMMs by the REML method ([Lynch & Walsh, 1998](#)). GzLMMs and GzLMs were performed  
598 using R-libraries lme4, nlme and lmerTest ([Douglas et al., 2015](#), [Kuznetsova et al., 2017](#),  
599 [Pinheiro et al., 2018](#)). Statistical analyses were conducted using R version 3.5.0 ([R Core Team,](#)  
600 [2018](#)).

601

## 602 **Acknowledgements**

603 Marisa López-Herranz and Miriam Gil-Valle provided excellent technical assistance. This work  
604 was supported by Plan Nacional I+D+i, MINECO, Spain [BIO2016-79165-R] to IP. NM was  
605 supported by Ministerio de Economía y Competitividad (Instituto de Salud Carlos III)  
606 [PIE13/00041], and VV by an Erasmus Mundus BRAVE Scholarship of the EU [2013-  
607 2536/001-001].

608

## 609 **Competing Interests**

610 The authors declare no competing interests.

611

## 612 **References**

- 613 Agnew P, Koella JC, Michalakis Y. 2000. Host life history responses to parasitism. *Microbes*  
614 *and Infection* 2: 891–896. DOI: [https://doi.org/10.1016/S1286-4579\(00\)00389-0](https://doi.org/10.1016/S1286-4579(00)00389-0), PMID:  
615 10962272
- 616 Akiyama R, Ågren J. 2014. Conflicting selection on the timing of germination in a natural  
617 population of *Arabidopsis thaliana*. *Journal of Evolutionary Biology* 27: 193–199. DOI:  
618 <https://doi.org/10.1111/jeb.12293>
- 619 Anderson PK, Cunningham AA, Patel NG, Morales FJ, Epstein PR, Daszak P. 2004. Emerging  
620 infectious diseases of plants: pathogen pollution, climate change and agrotechnology  
621 drivers. *Trends in Ecology & Evolution* 19: 535–544. DOI:  
622 <https://doi.org/10.1016/j.tree.2004.07.021>
- 623 Antonovics J. 2009. The effect of sterilizing diseases on host abundance and distribution along  
624 environmental gradients. *Proceedings of the Royal Society B: Biological Sciences* 276:  
625 1443–1448. DOI: <https://doi.org/10.1098/rspb.2008.1256>
- 626 Bates D, Maechler M, Bolker B, Walker S. 2015. Fitting Linear Mixed-Effects Models using  
627 lme4. *Journal of Statistic Software* 67: 1–48. DOI: <https://doi.org/10.18637/jss.v067.i01>
- 628 Baucom RS, de Roode JC. 2011. Ecological immunology and tolerance in plants and animals.  
629 *Functional Ecology* 25: 18–28. DOI: <https://doi.org/10.1111/j.1365-2435.2010.01742.x>
- 630 Best A, White A, Boots M. 2008. Maintenance of host variation in tolerance to pathogens and  
631 parasites. *Proceedings of the National Academy of Sciences USA* 105: 20786–20791. DOI:  
632 <https://doi.org/10.1073/pnas.0809558105>
- 633 Best A, White A, Boots M. 2010. Resistance is futile but tolerance explains why parasites do  
634 not castrate their hosts. *Evolution* 64: 348–357. DOI: <https://doi.org/10.1111/j.1558-5646.2009.00819.x>
- 636 Boots M, Bowers RG. 1999. Three mechanisms of host resistance to microparasites –  
637 avoidance, recovery and tolerance – show different evolutionary dynamics. *Journal of*  
638 *Theoretical Biology* 201: 13–23. DOI: <https://doi.org/10.1006/jtbi.1999.1009>
- 639 Boots M, Sasaki A. 2002. Parasite-driven extinction in spatially explicit host–parasite systems.  
640 *The American Naturalist* 159: 706–713. DOI: <https://doi.org/10.1086/339996>
- 641 Boyes DC, Zayed AM, Ascenzi R, McCaskill AJ, Hoffman NE, Davis KR, Görlach J. 2001.  
642 Growth stage–based phenotypic analysis of *Arabidopsis*: A model for high throughput  
643 functional genomics in plants. *Plant Cell* 13: 1499–1510. DOI:  
644 <https://doi.org/10.1105/tpc.010011>
- 645 Carr DE, Murphy JF, Eubanks MD. 2006. Genetic variation and covariation for resistance and  
646 tolerance to *Cucumber mosaic virus* in *Mimulus guttatus* Phrymaceae: A test for costs and  
647 constraints. *Heredity* 96: 29–38. DOI: <https://doi.org/10.1038/sj.hdy.6800743>

- 648 Clarke DD. 1986. Tolerance of parasites and disease in plants and its significance in host-  
649 parasite interactions. *Advances in Plant Pathology* 5: 161–198.
- 650 Day T. 2002. On the evolution of virulence and the relationship between various measures of  
651 mortality. *Proceedings of the Royal Society B: Biological Sciences* 269: 1317–1323. DOI:  
652 <https://doi.org/10.1098/rspb.2002.2021>
- 653 Ebert D, Carius HJ, Little T, Decaestecker E. 2004. The evolution of virulence when parasites  
654 cause host castration and gigantism. *The American Naturalist* 164: S19–S32. DOI:  
655 <https://doi.org/10.1086/424606>
- 656 Fornoni J, Núñez-Farfán J, Valverde PL, Rausher MD. 2004. Evolution of mixed strategies of  
657 plant defence allocation against natural enemies. *Evolution* 58: 1685–1695. DOI:  
658 <https://doi.org/10.1554/03-510>
- 659 Fredensborg BL, Poulin R. 2006. Parasitism shaping host life-history evolution: adaptive  
660 responses in a marine gastropod to infection by trematodes. *Journal of Animal Ecology* 75:  
661 44–53. DOI: <https://doi.org/10.1111/j.1365-2656.2005.01021.x>
- 662 Fujisawa I. 1985. Aphid transmission of *Turnip mosaic virus* and *Cucumber mosaic virus*. 2.  
663 Transmission from virus mixtures. *Annals of the Phytopathology Society of Japan* 51: 562–  
664 568. DOI: <https://doi.org/10.3186/jjphytopath.51.562>
- 665 Gandon S, Agnew P, Michalakis Y. 2002. Coevolution between parasite virulence and host  
666 life-history traits. *The American Naturalist* 160: 374–388. DOI:  
667 <https://doi.org/10.1086/341525>
- 668 Gioria M, Pyšek P, Osborne BA. 2018. Timing is everything: does early and late germination  
669 favor invasions by herbaceous alien plants? *Journal of Plant Ecology* 11: 4–16. DOI:  
670 <https://doi.org/10.1093/jpe/rtw105>
- 671 Goss EM, Bergelson J. 2006. Variation in resistance and virulence in the interaction between  
672 *Arabidopsis thaliana* and a bacterial pathogen. *Evolution* 60: 1562–1573. DOI:  
673 <https://doi.org/10.1554/06-200.1>
- 674 Hall SR, Becker C, Cáceres CE. 2007. Parasitic castration: a perspective from a model of  
675 dynamic energy budgets. *Integrative and Comparative Biology* 47:295–309. DOI:  
676 <https://doi.org/10.1093/icb/icm057>
- 677 Herms DA, Mattson WJ. 1992. The dilemma of plants: To grow or defend. *The Quarterly*  
678 *Review of Biology* 67: 283–335. DOI: <https://doi.org/10.1086/417659>
- 679 Hily JM, García A, Moreno A, Plaza M, Wilkinson MD, Fereres A, Fraile A, García-Arenal F.  
680 2014. The relationship between host lifespan and pathogen reservoir potential: An analysis  
681 in the system *Arabidopsis thaliana*–*Cucumber mosaic virus*. *PLoS Pathogens* 10: e1004492.  
682 DOI: 10.1371/journal.ppat.1004492

- 683 Hily JM, Poulicard N, Mora MA, Pagán I, García-Arenal F. 2016. Environment and host  
684 genotype determine the outcome of a plant–virus interaction: from antagonism to mutualism.  
685 *New Phytologist* 209: 812–822. DOI: <https://doi.org/10.1111/nph.13631>
- 686 Hochberg ME, Michalakis Y, de Meeus T. 1992. Parasitism as a constraint on the rate of life-  
687 history evolution. *Journal of Evolutionary Biology* 5: 491–504. DOI:  
688 <https://doi.org/10.1046/j.1420-9101.1992.5030491.x>
- 689 Jaenike J. 1996. Suboptimal virulence of an insect–parasitic nematode. *Evolution* 50: 2241–  
690 2247 DOI: <https://doi.org/10.1046/j.1420-9101.1992.5030491.x>
- 691 Jones JDG, Dangl JL. 2006. The plant immune system. *Nature* 444: 323–329. DOI:  
692 <https://doi.org/10.1038/nature05286>
- 693 Kover PX, Schaal BA. 2002. Genetic variation for disease resistance and tolerance among  
694 *Arabidopsis thaliana* accessions. *Proceedings of the National Academy of Sciences USA*  
695 99: 11270–11274. DOI: <https://doi.org/10.1073/pnas.102288999>
- 696 Kutzer MA, Armitage SA. 2016. Maximising fitness in the face of parasites: a review of host  
697 tolerance. *Zoology* 119: 281–289. DOI: <https://doi.org/10.1016/j.zool.2016.05.011>
- 698 Kuznetsova A, Brockhoff PB, Christensen RHB. 2017. ImerTest Package: Tests in Linear  
699 Mixed Effects Models. *Journal of Statistic Software* 82: 1–26. DOI:  
700 <https://doi.org/10.18637/jss.v082.i13>
- 701 Lafferty KD, Kuris AM. 2009. Parasitic castration: the evolution and ecology of body snatchers.  
702 *Trends in Parasitology* 25: 564–572. DOI: <https://doi.org/10.1016/j.pt.2009.09.003>
- 703 Little TJ, Shuker DM, Colegrave N, Day T, Graham AL. 2010. The coevolution of virulence:  
704 tolerance in perspective. *PLoS Pathogens* 6: e1001006. DOI:  
705 <https://doi.org/10.1371/journal.ppat.1001006>
- 706 Lunello P, Mansilla C, Sánchez F, Ponz F. 2007. A developmentally linked, dramatic, and  
707 transient loss of virus from roots of *Arabidopsis thaliana* plants infected by either of two RNA  
708 viruses. *Molecular Plant-Microbe Interactions* 20: 1589–1595. DOI:  
709 <https://doi.org/10.1094/MPMI-20-12-1589>
- 710 Lynch M, Walsh B. 1998. Genetics and analysis of quantitative traits. Sunderland, MA, USA:  
711 Sinauer Associates Inc.
- 712 Manzano-Piedras E, Marcer A, Alonso–Blanco C, Picó FX. 2014. Deciphering the adjustment  
713 between environment and life history in annuals: Lessons from a geographically–explicit  
714 approach in *Arabidopsis thaliana*. *PLoS ONE* 9: e87836. DOI:  
715 <https://doi.org/10.1371/journal.pone.0087836>
- 716 Mauricio R, Rausher MD, Burdick DS. 1997. Variation in the defence strategies of plants: are  
717 resistance and tolerance mutually exclusive? *Ecology* 78: 1301–1311. DOI: <https://doi.org/10.2307/2266125>
- 718

- 719 McLeod DV, Day T. 2015. Pathogen evolution under host avoidance plasticity. *Proceedings of*  
720 *the Royal Society B: Biological Sciences* 282: 20151656. DOI 10.1098/rspb.2015.1656
- 721 Méndez-Vigo B, de Andrés MT, Ramiro M, Martínez-Zapater JM, Alonso-Blanco C. 2010.  
722 Temporal analysis of natural variation for the rate of leaf production and its relationship with  
723 flowering initiation in *Arabidopsis thaliana*. *Journal of Experimental Botany* 61: 1611–1623.  
724 DOI: <https://doi.org/10.1093/jxb/erq032>
- 725 Michalakakis Y, Hochberg ME. 1994. Parasitic effects on host life-history traits: A review of recent  
726 studies. *Parasite* 1: 291–294 DOI: <https://doi.org/10.1051/parasite/1994014291>
- 727 Minchella DJ. 1985. Host life-history variation in response to parasitism. *Parasitology* 90: 205–  
728 216. DOI: <https://doi.org/10.1017/S0031182000049143>
- 729 Montes N, Alonso-Blanco C., García-Arenal F. 2019. *Cucumber mosaic virus* infection as a  
730 potential selective pressure on *Arabidopsis thaliana* population. *PLoS Pathogens* 15:  
731 e1007810. DOI: <https://doi.org/10.1371/journal.ppat.1007810>
- 732 Montes N, Pagán I. 2019. Light intensity modulates the efficiency of virus seed transmission  
733 through modifications of plant tolerance. *Plants In press*.
- 734 O’Keefe KJ, Antonovics J. 2002. Playing by different rules: The evolution of virulence in  
735 sterilizing pathogens. *The American Naturalist* 159: 597–605. DOI:  
736 <https://doi.org/10.1086/339990>
- 737 Pagán I, Alonso-Blanco C, García-Arenal F. 2007. The relationship of within-host multiplication  
738 and virulence in a plant–virus system. *PLoS ONE* 2: e786. DOI  
739 10.1371/journal.pone.0000786
- 740 Pagán I, Alonso-Blanco C, García-Arenal F. 2008. Host responses in life–history traits and  
741 tolerance to virus infection in *Arabidopsis thaliana*. *PLoS Pathogens* 4: e1000124. DOI  
742 10.1371/journal.ppat.1000124
- 743 Pagán I, Alonso-Blanco C, García-Arenal F. 2009. Differential tolerance to direct and indirect  
744 density–dependent costs of viral infection in *Arabidopsis thaliana*. *PLoS Pathogens* 5:  
745 e1000531 DOI: <https://doi.org/10.1371/journal.ppat.1000531>
- 746 Pagán I, Fraile A, Fernández-Fueyo E, Montes N, Alonso-Blanco C, García-Arenal F. 2010.  
747 *Arabidopsis thaliana* as a model for the study of plant-virus co-evolution. *Philosophical*  
748 *Transactions of the Royal Society B* 365: 1983–1995. DOI:  
749 <https://doi.org/10.1098/rstb.2010.0062>
- 750 Pagán I, García–Arenal F. 2018. Tolerance to plant pathogens: Theory and experimental  
751 evidence. *International Journal of Molecular Sciences* 19: 810. DOI:  
752 <https://doi.org/10.3390/ijms19030810>
- 753 Pagán I, Montes N, Milgroom MG, García-Arenal F. 2014. Vertical transmission selects for  
754 reduced virulence in a plant virus and for increased resistance in the host. *PLoS Pathogens*  
755 10: e1004293. DOI: <https://doi.org/10.1371/journal.ppat.1004293>

- 756 Pinheiro J, Bates D, DebRoy S, Sarkar D, R Core Team. 2018. nlme: Linear and Nonlinear  
757 Mixed Effects Models. R package version 3.1–137. [WWW document] URL:  
758 <https://CRAN.R-project.org/package=nlme>. [accessed 6 September 2018].
- 759 Poulin R, Morand S. 2000. The diversity of parasites. *Quarterly Review Of Biology* 75: 277–  
760 293. DOI: <https://doi.org/10.1086/393500>
- 761 R Core Team 2018 R: A language and environment for statistical computing. R Foundation for  
762 Statistical Computing, Vienna, Austria.
- 763 Råberg L. 2014. How to live with the enemy: Understanding tolerance to parasites. *PLoS*  
764 *Biology* 12: e1001989. DOI: <https://doi.org/10.1371/journal.pbio.1001989>
- 765 Råberg L, Graham AL, Read AF. 2009. Decomposing health: Tolerance and resistance to  
766 parasites in animals. *Philosophical Transactions of the Royal Society B* 364: 37–49. DOI:  
767 <https://doi.org/10.1098/rstb.2008.0184>
- 768 Rausher MD. 2001. Co-evolution and plant resistance to natural enemies. *Nature* 411: 857–  
769 864. DOI: <https://doi.org/10.1038/35081193>
- 770 Read AF. 1994. The evolution of virulence. *Trends in Microbiology* 2: 73–76. DOI:  
771 [https://doi.org/10.1016/0966-842X\(94\)90537-1](https://doi.org/10.1016/0966-842X(94)90537-1)
- 772 Restif O, Koella JC. 2003. Shared control of epidemiological traits in a coevolutionary model  
773 of host-parasite interactions. *The American Naturalist* 161: 827–836. DOI:  
774 <https://doi.org/10.1086/375171>
- 775 Restif O, Koella JC. 2004. Concurrent evolution of resistance and tolerance to pathogens. *The*  
776 *American Naturalist* 164: E90–E102. DOI: <https://doi.org/10.1086/423713>
- 777 Rohr JR, Raffel TR, Hall CA. 2010. Developmental variation in resistance and tolerance in a  
778 multi-host-parasite system. *Functional Ecology* 24: 1110–1121. DOI:  
779 <https://doi.org/10.1111/j.1365-2435.2010.01709.x>
- 780 Rosenthal JP, Kotanen PM. 1994. Terrestrial plant tolerance to herbivory. *Trends in Ecology*  
781 *and Evolution* 9: 145–148. DOI: [https://doi.org/10.1016/0169-5347\(94\)90180-5](https://doi.org/10.1016/0169-5347(94)90180-5)
- 782 Roy BA, Kirchner JW. 2000. Evolutionary dynamics of pathogen resistance and tolerance.  
783 *Evolution* 54: 51–63. DOI: <https://doi.org/10.1111/j.0014-3820.2000.tb00007.x>
- 784 Sánchez F, Manrique P, Mansilla C, Lunello P, Wang X, Rodrigo G, López-González S, Jenner  
785 C, González-Melendi P, Elena SF, Walsh J, Ponz F. 2015. Viral strain-specific differential  
786 alterations in Arabidopsis developmental patterns. *Molecular Plant-Microbe Interactions*  
787 28: 1304–1315. DOI: <https://doi.org/10.1094/MPMI-05-15-0111-R>
- 788 Sánchez F, Martínez-Herrera D, Aguilar I, Ponz, F. 1998. Infectivity of *Turnip mosaic potyvirus*  
789 cDNA clones and transcripts on the systemic host *Arabidopsis thaliana* and local lesion  
790 hosts. *Virus Research* 55: 207–219. DOI: [https://doi.org/10.1016/S0168-1702\(98\)00049-5](https://doi.org/10.1016/S0168-1702(98)00049-5)
- 791 Schlichting C, Pigliucci M. 1998. Phenotypic plasticity: A reaction norm perspective. Sinauer  
792 Associates: Sunderland, MA, USA.

- 793 Sharbel TF, Haubold B, Mitchell-Olds T. 2000. Genetic isolation by distance in *Arabidopsis*  
794 *thaliana*: biogeography and postglacial colonization of Europe. *Molecular Ecology* 9: 2109–  
795 2118. DOI: <https://doi.org/10.1046/j.1365-294X.2000.01122.x>
- 796 Shuckla A, Pagán I, García-Arenal F. 2018. Effective tolerance based on resource reallocation  
797 is a virus-specific defence in *Arabidopsis thaliana*. *Molecular Plant Pathology* 19: 1454–  
798 1465. DOI: <https://doi.org/10.1111/mpp.12629>
- 799 Simms E, Triplett J. 1994. Costs and benefits of plant responses to disease: Resistance and  
800 tolerance. *Evolution* 48: 1973–1985. DOI: <https://doi.org/10.1111/j.1558->  
801 5646.1994.tb02227.x
- 802 Stearns SC. 1992. The evolution of life histories. Oxford University Press: London, UK.
- 803 Strauss SY, Agrawal AA. 1999. The ecology and evolution of plant tolerance to herbivory.  
804 *Trends in Ecology & Evolution* 14: 179–185. DOI: <https://doi.org/10.1016/S0169->  
805 5347(98)01576-6
- 806 Syller J. 2012. Facilitative and antagonistic interactions between plant viruses in mixed  
807 infections. *Molecular Plant Pathology* 13: 204–216. DOI: <https://doi.org/10.1111/j.1364->  
808 3703.2011.00734.x
- 809 Thompson K, Stewart AJA. 1981. The measurement and meaning of reproductive effort in  
810 plants. *The American Naturalist* 117: 205–211. DOI: <https://doi.org/10.1086/283700>
- 811 Vale PF, Little TJ. 2012. Fecundity compensation and tolerance to a sterilizing pathogen in  
812 *Daphnia*. *Journal of Evolutionary Biology* 25: 1888–1896. DOI:  
813 <https://doi.org/10.1111/j.1420-9101.2012.02579.x>
- 814 van der Meijden E, Wijn H, Verkaar J. 1988. Defence and regrowth: alternative plant strategies  
815 in the struggle against herbivores. *Oikos* 51: 355–363. DOI:  
816 <https://doi.org/10.2307/3565318>
- 817 Vijayan V, López-González S, Sánchez F, Ponz F, Pagán I. 2017. Virulence evolution of a  
818 sterilizing plant virus: tuning multiplication and resource exploitation. *Virus Evolution* 3:  
819 vex033. DOI: <https://doi.org/10.1093/ve/vex033>
- 820 Woolhouse MEJ, Webster JP, Domingo E, Charlesworth B, Levin BR. 2002. Biological and  
821 biomedical implications of the co-evolution of pathogens and their hosts. *Nature Genetics*  
822 32: 569–577. DOI: <https://doi.org/10.1038/ng1202-569>
- 823 Zhang X, Yuan YR, Pei Y, Lin SS, Tuschl T, Patel DJ, Chua NH. 2006. *Cucumber mosaic*  
824 *virus*-encoded 2b suppressor inhibits *Arabidopsis* Argonaute1 cleavage activity to counter  
825 plant defense. *Genes & Development* 20: 3255–3268. DOI:  
826 <https://doi.org/10.1101/gad.1495506>
- 827
- 828
- 829

830  
831  
832  
833  
834  
835  
836  
837  
838  
839  
840  
841  
842  
843  
844  
845  
846  
847  
848  
849  
850  
851  
852  
853  
854  
855  
856  
857  
858  
859  
860  
861  
862  
863  
864  
865  
866

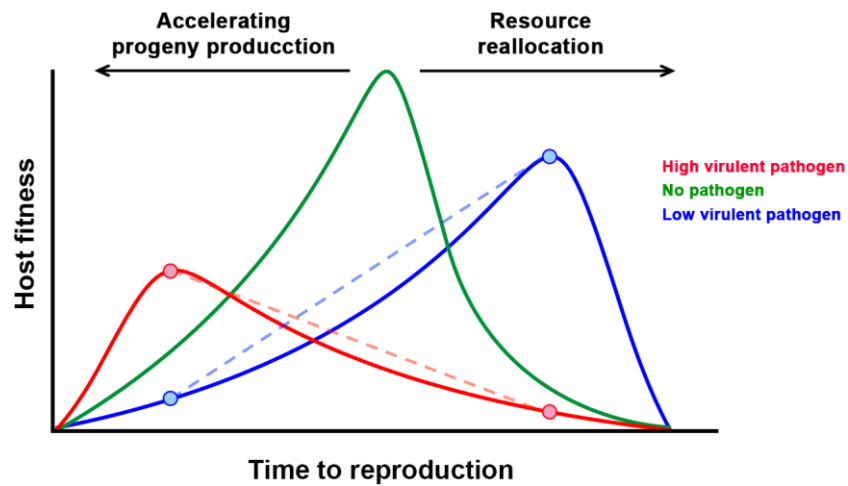

**Figure 1. Which way to go?** According to the Life-history Theory, hosts would modify their time to reproduction in opposite ways in order to achieve tolerance: when infected by a highly virulent pathogen (red line), hosts would bring forward reproduction to produce progeny before death; and when infected by a low virulent pathogen (blue line), host would delay reproduction so they can reallocate resources from growth to reproduction. These strategies would maximize fitness in the presence of one virus at the cost of reducing fitness in the presence of the other (crossed dotted lines), establishing a tolerance-tolerance trade-off.



867  
868  
869  
870  
871  
872  
873  
874  
875  
876  
877  
878  
879  
880  
881  
882  
883  
884  
885  
886  
887  
888  
889  
890  
891

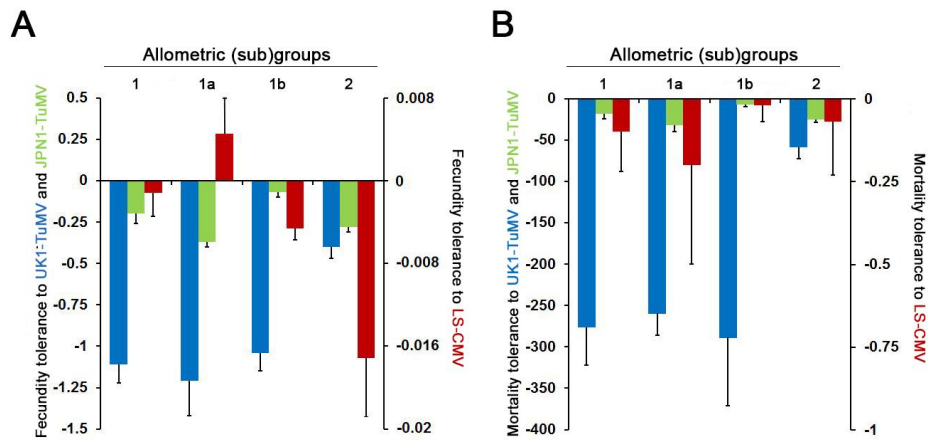

**Figure 2. Arabidopsis fecundity and mortality tolerance to UK1-TuMV, LS-CMV and JPN1-TuMV.** Panel A: Values of fecundity tolerance to UK1-TuMV (blue), to JPN1-TuMV (green) and to LS-CMV (red) measured as the slope of the *SW* to virus accumulation linear regression. Panel B: Values of mortality tolerance to the same three viruses measured as the slope of the *LP* to virus accumulation linear regression. Data are presented for allometric groups 1 and 2, and for subgroups 1a and 1b, and are mean  $\pm$  standard errors across plant genotypes.

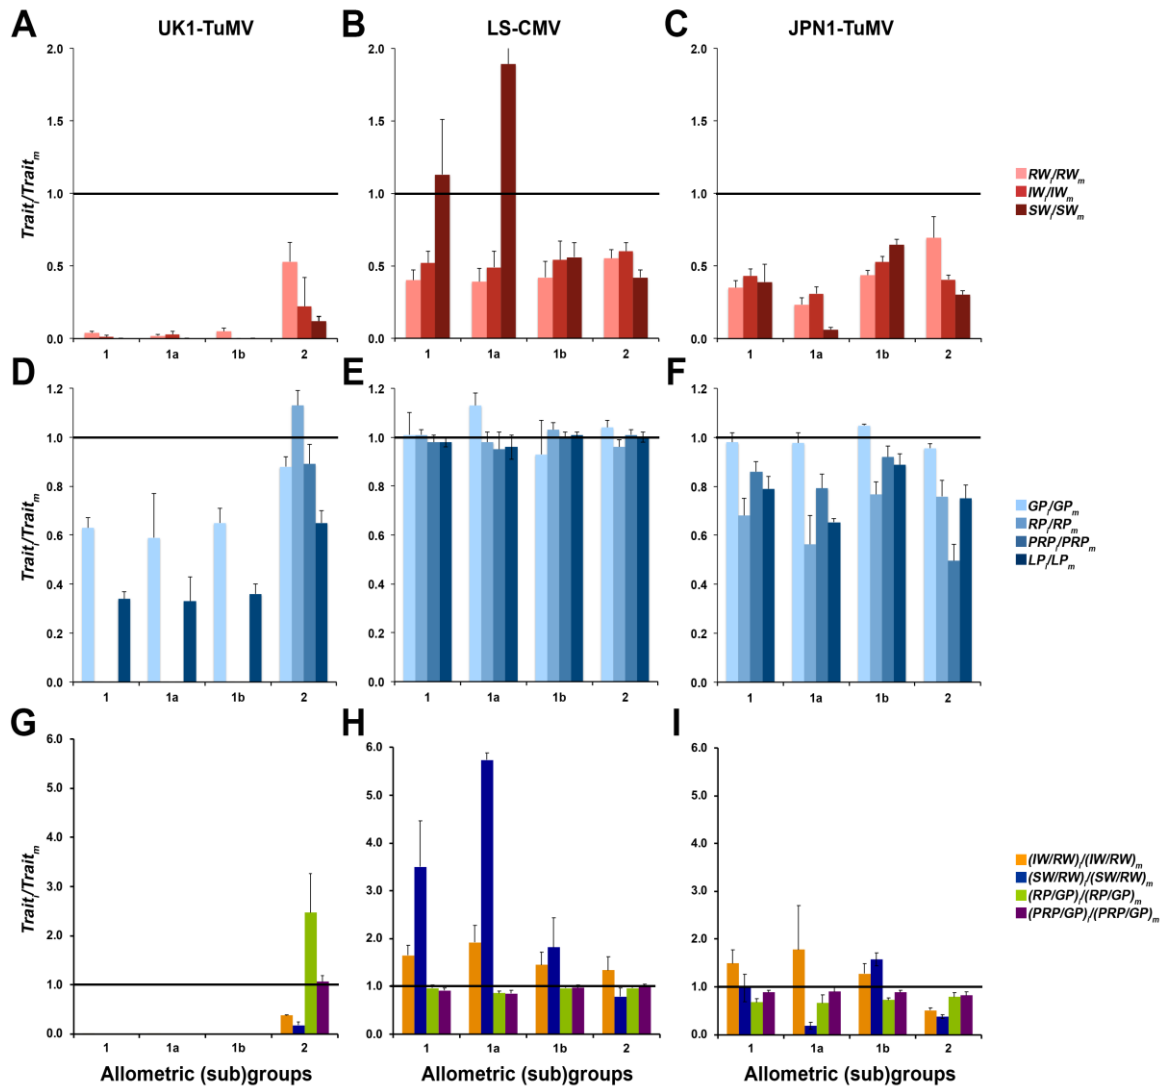

892

893 **Figure 3. Effect of UK1-TuMV, LS-CMV and JPN1-TuMV infection on life-history traits for**

894 **Arabidopsis allometric groups and subgroups.** Panels A-C: Effect of viral infection on

895 rosette weight (*RW*), inflorescence weight (*IW*) and seed weight (*SW*). Panels D-F: Effect of

896 viral infection on growth period (*GP*), reproductive period (*RP*) and post-reproductive period

897 (*PRP*). Panels G-I: Effect of infection on the ratios *IW/RW*, *SW/RW*, *RP/GP* and *PRP/GP*. All

898 effects were estimated as the ratio between infected (i) and mock-inoculated (m) plants. Data

899 are presented for allometric groups 1 and 2, and for subgroups 1a and 1b, and are mean  $\pm$

900 standard errors of plant genotype means.

901

902

903

904

905

906

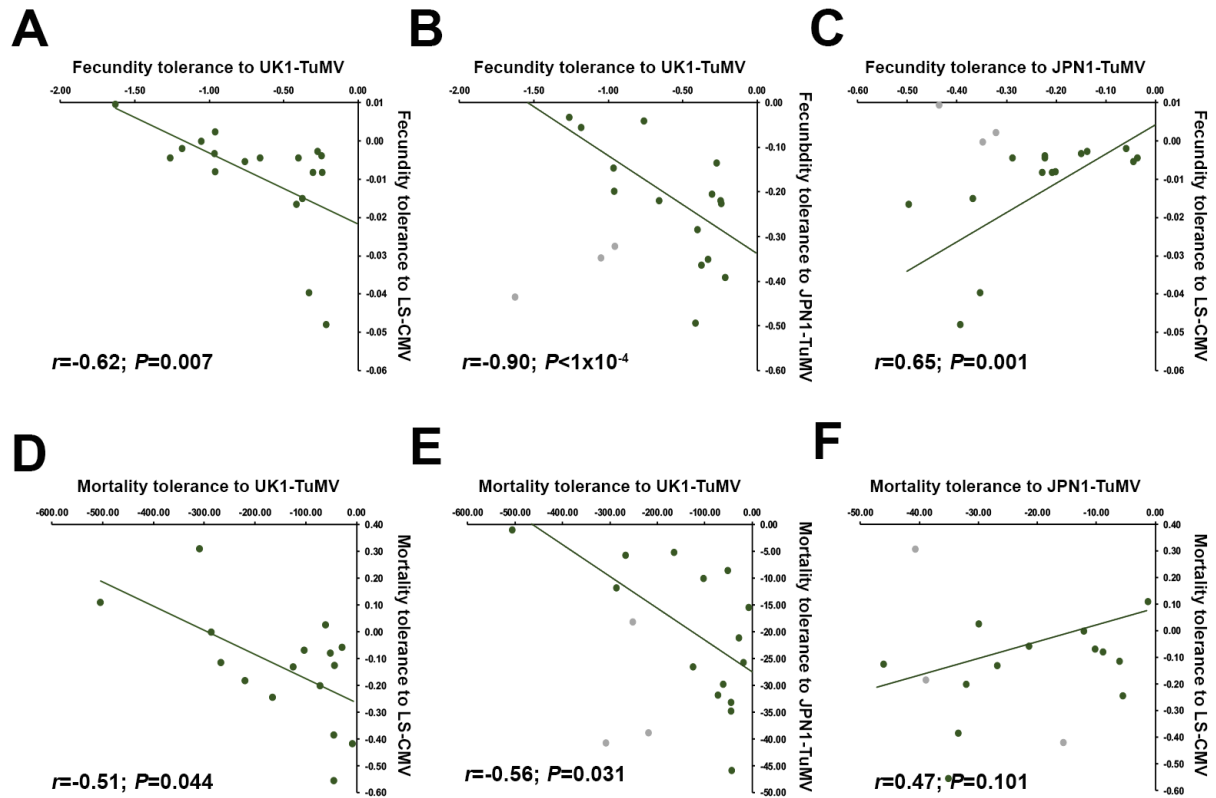

907

908 **Figure 4. Trade-offs between Arabidopsis tolerances to UK1-TuMV, LS-CMV and JPN1-**

909 **TuMV.** Panels A-C: Pairwise linear regressions between fecundity tolerance to UK1-TuMV,

910 LS-CMV and JPN1-TuMV. Panels D-F: Pairwise linear regressions between mortality

911 tolerance to UK1-TuMV, LS-CMV and JPN1-TuMV. Data are slope of the SW (fecundity

912 tolerance) and LP (mortality tolerance) to virus accumulation regression for each Arabidopsis

913 genotype. Grey dots correspond to values for Subgroup 1a genotypes, which were excluded

914 from the analyses.

915

916

917

918

919

920

921

922

923

924

925

926

927

928 **Table 1.** Arabidopsis genotypes used in this work, their geographical origin and allometric  
929 group/subgroup.

| <b>Genotype</b> | <b>Origin</b>                   | <b>Allometric group (subgroup)</b> |
|-----------------|---------------------------------|------------------------------------|
| Cum-0           | Cumbres Mayores (Spain)         | Group 1(a)                         |
| Kas-0           | Kashmir (India)                 | Group 1(a)                         |
| LI-0            | Llagostera (Spain)              | Group 1(a)                         |
| Cad-0           | Candelario (Spain)              | Group 1(b)                         |
| Cdm-0           | Caldas de Miravete (Spain)      | Group 1(b)                         |
| Kas-2           | Kashmir (India)                 | Group 1(b)                         |
| Kyo-1           | Kyoto (Japan)                   | Group 1(b)                         |
| An-1            | Amberes (Belgium)               | Group 2                            |
| Bay-0           | Bayreuth (Germany)              | Group 2                            |
| Col-0           | Columbia (Unknown)              | Group 2                            |
| Cvi             | Cape Verde Islands              | Group 2                            |
| Fei-0           | Santa María da Feira (Portugal) | Group 2                            |
| Ler             | Landsberg (Poland)              | Group 2                            |
| Cen-1           | Centenera (Spain)               | Group 2                            |
| Mer-0           | Mérida (Spain)                  | Group 2                            |
| Pro-0           | Proaza (Spain)                  | Group 2                            |
| Shak            | Shakdara (Tadjikistan)          | Group 2                            |
| Ver-5           | Verin (Spain)                   | Group 2                            |

930
